# Supplementary material
Source: publisher figshare collection journal article supplement (https://acs.figshare.com/ndownloader/files/22775516)
Supplement: Supplementary file 1 [file 22775516]

# Optical Thermometry with Quantum Emitters in Hexagonal Boron Nitride

Yongliang Chen,<sup>1</sup> Thinh Ngoc Tran,<sup>1</sup> Ngoc My Hanh Duong,<sup>1</sup> Chi Li,<sup>1</sup> Milos Toth,<sup>1,2</sup> Carlo Bradac,<sup>1</sup> Igor Aharonovich,<sup>1,2</sup> Alexander Solntsev,<sup>1</sup> Toan Trong Tran<sup>1\*</sup>

1. School of Mathematical and Physical Sciences, University of Technology Sydney, Ultimo, NSW, 2007, Australia

2. ARC Center of Excellence for Transformative Meta-Optical Systems (TMOS), Faculty of Science, University of Technology Sydney, Australia

\*Corresponding author: [trongtoan.tran@uts.edu.au](mailto:trongtoan.tran@uts.edu.au)

KEYWORDS: optical thermometry, temperature sensing, hexagonal boron nitride, deterministic positioning, quantum emitter, micro-circuits.

## SI1. Align-transfer setup

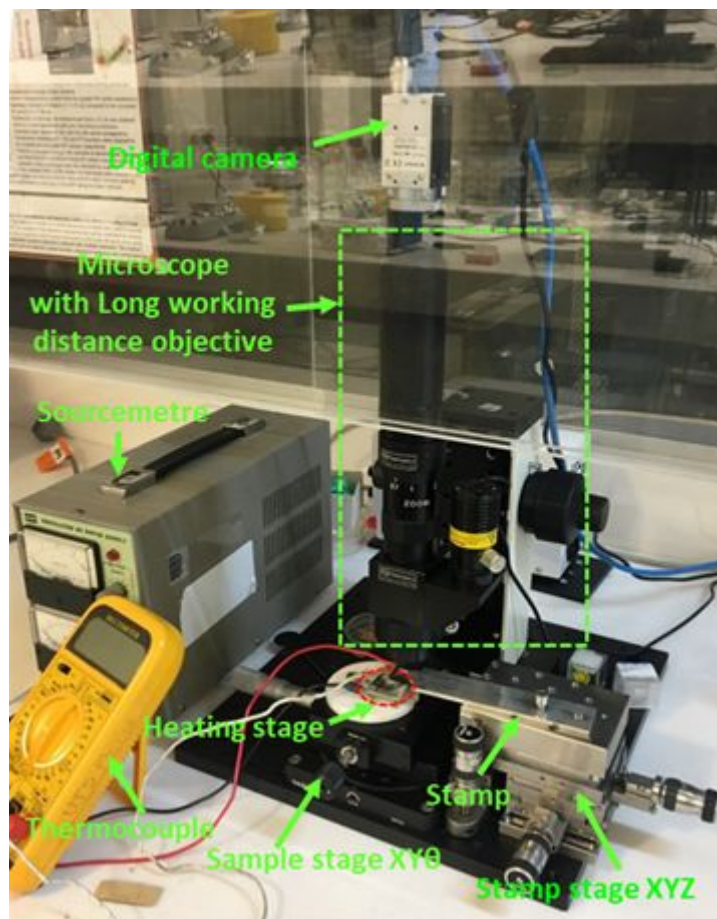

**Figure S1.** Photograph of the dry align-transfer setup.

## SI2. Characterisation of a typical hBN quantum emitter

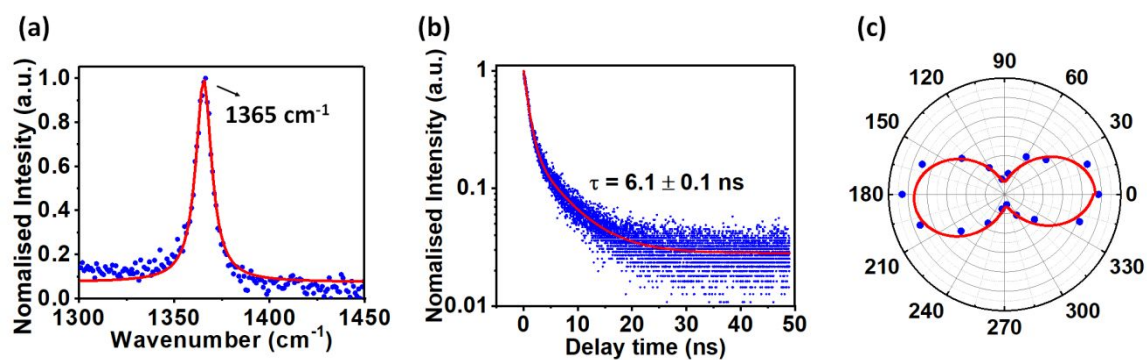

**Figure S2.** **a)** Typical Raman spectrum taken for the hBN nanothermometer in Figure 2 of the main text. The solid red trace is the fit to a single Lorentzian function. **b)** Time-resolved fluorescence measurement revealing a radiative lifetime of  $(6.1 \pm 0.1) \text{ ns}$ . The solid red trace

is a fit to a single exponential function. **c)** Emission polarization plot of the single-photon emitter. The solid red line is a fit to a  $\cos^2(\theta)$  function.

### SI3. Analysis of the nanothermometer resolution

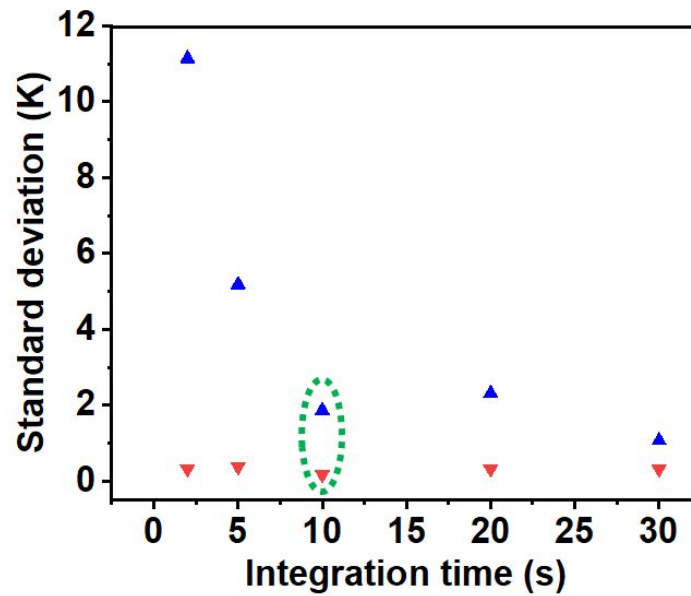

**Figure S3.** Temperature uncertainty at room-temperature of the hBN quantum nanothermometer Figures 3a, b, c and d in the main text. (▲) Standard deviation for the ZPL position measured at room temperature. The acquisition was carried out using a PL confocal setup with an air objective (NA = 0.7), 500  $\mu$ W of 532-nm laser power and a low-resolution spectrometer (QEPro, Ocean Optics, cf. main text, Methods). Note that the standard deviation gets smaller (i.e. the resolution increases) as the signal-to noise ratio improves due to longer integration times. (▼) Same measurement as in (a) but using a more sensitive setup: air objective (NA = 0.9), 300  $\mu$ W of 532-nm laser power and a high-resolution spectrometer (Princeton Instrument Spectra Pro). As expected the signal-to-noise ratio improves leading to a higher resolution.

The green dotted circle indicates our experimental condition (10-s integration time) throughout the study, cf. main text.

# SI4. hBN nanothermometers: characterization of temperature response

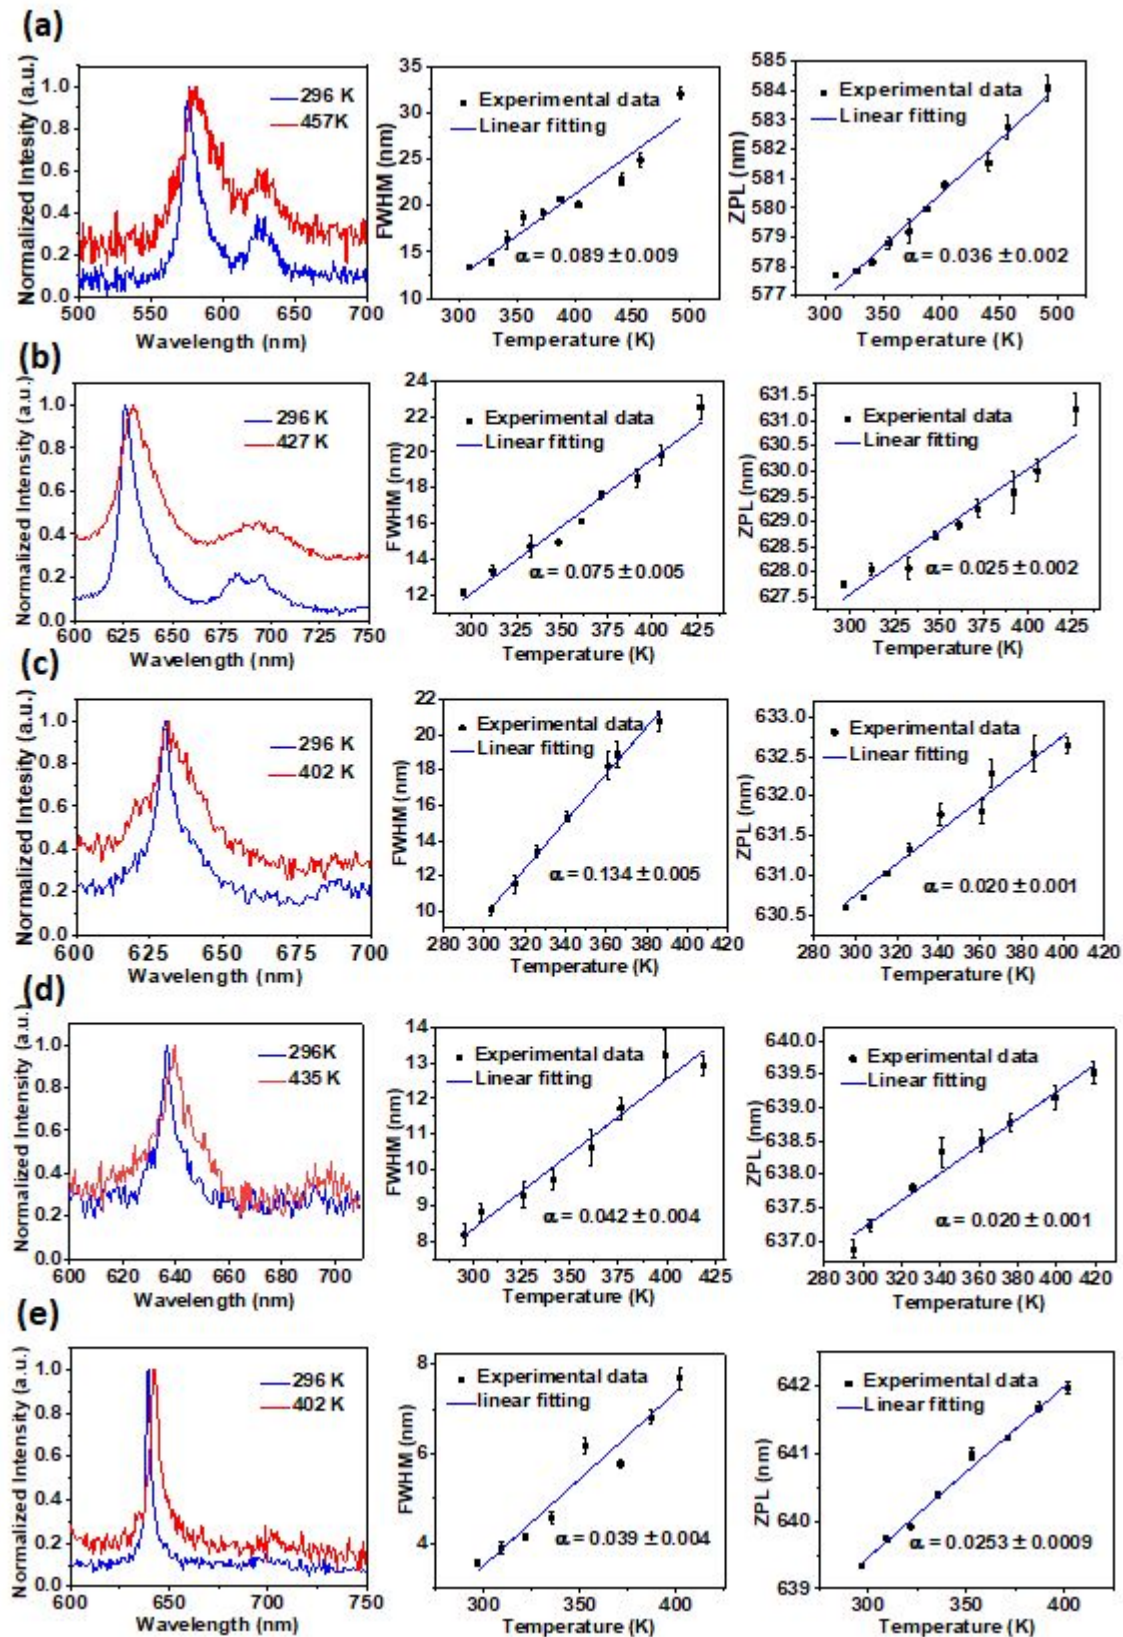



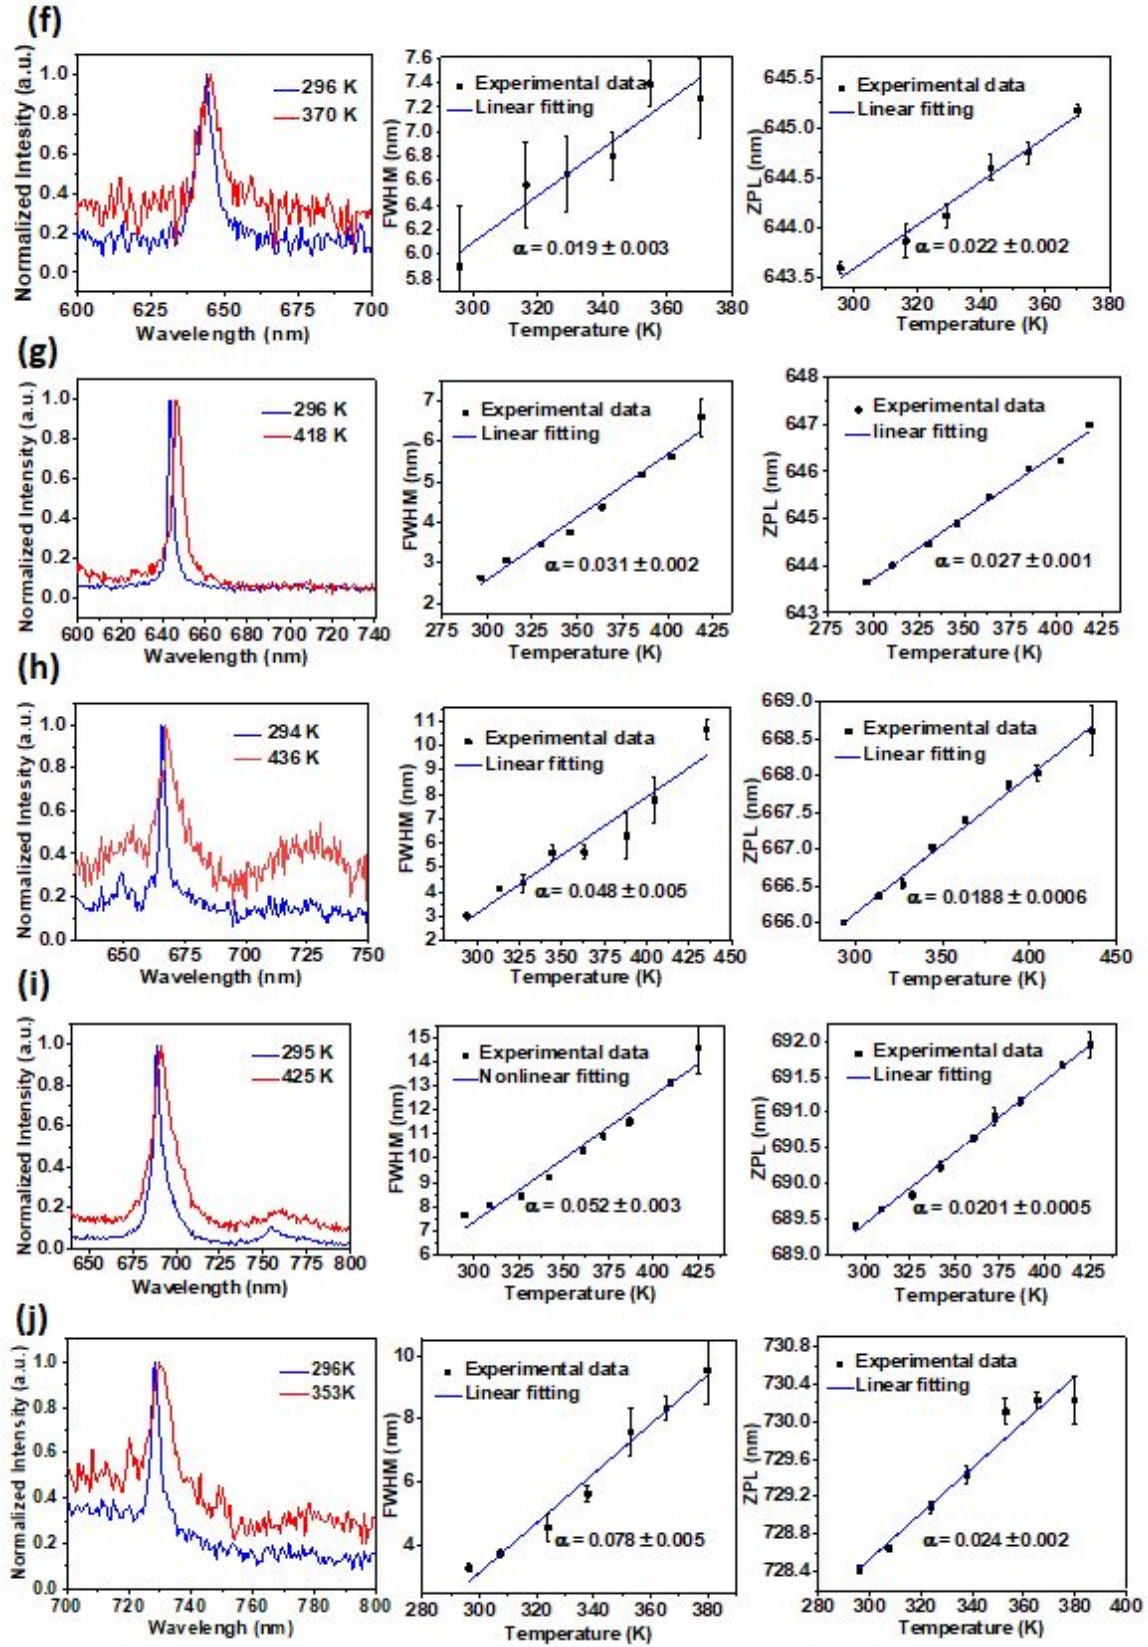

**Figure S4.** Temperature calibration of several representative hBN nanothermometers. **a–j)** Left-panels: PL spectra at two different temperatures under 532-nm excitation. Mid and right panels: corresponding linear variance of FWHM and ZPL as a function of temperature. Note that the room-temperature ZPL wavelength differs from emitter to emitter: (a) 577.6 nm, (b) 627.8 nm, (c) 630.6 nm (this emitter was as nanothermometer in position 3 in Figure 3f), (d) 636.9 nm (this emitter was as nanothermometer in position 2 in Figure 3f), (e) 639.3 nm, (f) 643.6 nm (this emitter was as nanothermometer in position 1 in Figure 3f), (g) 643.7 nm, (h) 666.1 nm (this emitter was as nanothermometer in position 1 in Figure S6), (i) 689.4 nm and (j) 728.4 nm (this emitter was as nanothermometer in Figure 3d).

#### SI5. Temperature measurements in working micro-circuits

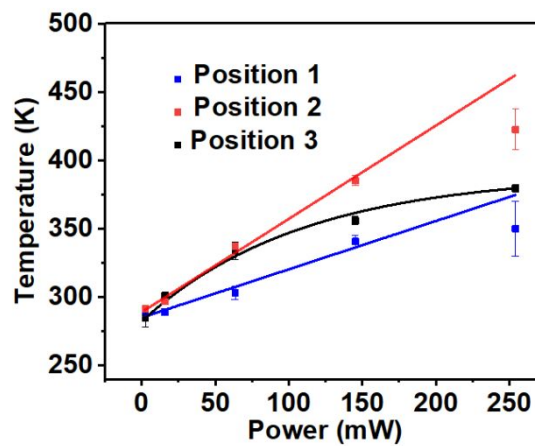

**Figure S5.** Relationship between temperature and power of three different positions on the studied chromium micro-circuit (cf. main text, Fig. 3f). The linear relationship with the temperature of on-circuits locations is due to the simple Joule heating phenomenon, the non-linear trend at the off-circuit location is attributed to the heat sink effect by the substrate.”

### SI6. Demonstration of temperature measurement on a nickel micro circuit

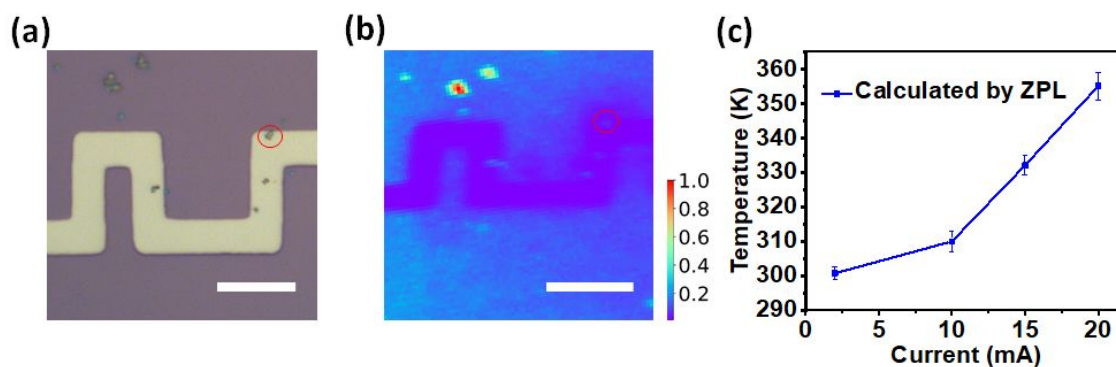

**Figure S6.** Temperature monitoring of a nickel micro-circuit using a hBN nanothermometer. The inset scale is 10  $\mu\text{m}$ . **a)** Optical image of the nickel microcircuit made via EBL (the hBN flake is marked by the red circle). **b)** Corresponding PL confocal map. **c)** Temperature measurement from the targeted position using the ZPL wavelength shift.

### SI7. Sensitivity of different hBN nanothermometers

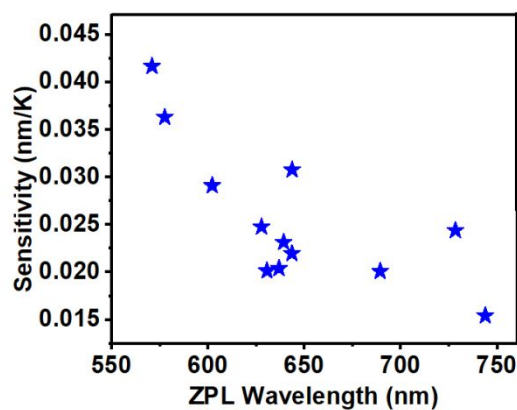

**Figure S7.** A summary of the sensitivities estimated as the derivative  $d\text{ZPL}/dT$  for several emitters in hBN that can be used as nanothermometers.

**SI8. AFM characterisation of a hBN flake transferred onto a micro circuit**

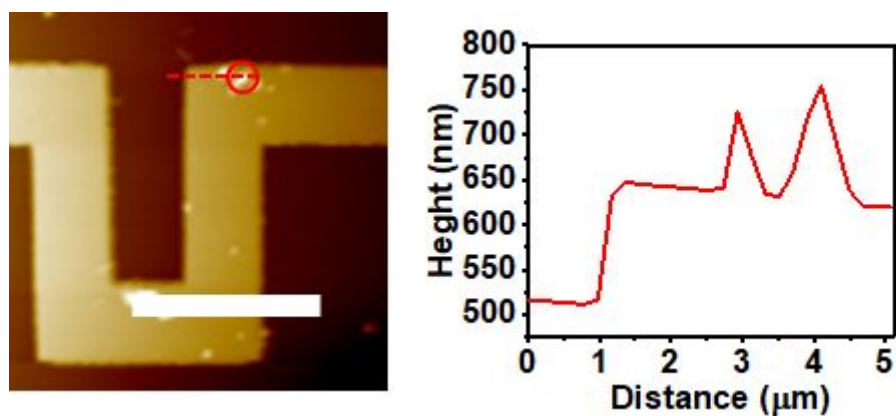

**Figure S8.** AFM image taken at Position 1 (cf. main text, Fig. 3) in the chromium micro-circuit used in the study. The hBN nanothermometer is ~900-nm wide and ~100-nm thick.
